# Supplementary material for: Solvothermally-derived MoO3-benzotriazole hybrid structures for nanocontainer depot systems
Source: Royal Society of Chemistry journal article supplement (doi:10.1039/d0nj02326d), 2020-01-01
Supplement: d0nj02326d1.pdf [file d0nj02326d1.pdf]

## Supplementary Material

### New Journal of Chemistry

#### Solvothermally-derived $\text{MoO}_3$ -benzotriazole hybrid structures for nanocontainer depot systems

Alexander S. Logvinovich, Tatyana V. Sviridova, Elizaveta A. Konstantinova,  
Alexander I. Kokorin, Dmitry V. Sviridov

Typical SEM images showing the general morphology of microparticles of bare  $h\text{-MoO}_3$  and BTA-intercalated  $\text{MoO}_3$  obtained *via* solvothermal technique under the similar growing conditions are represented in Figure S1.

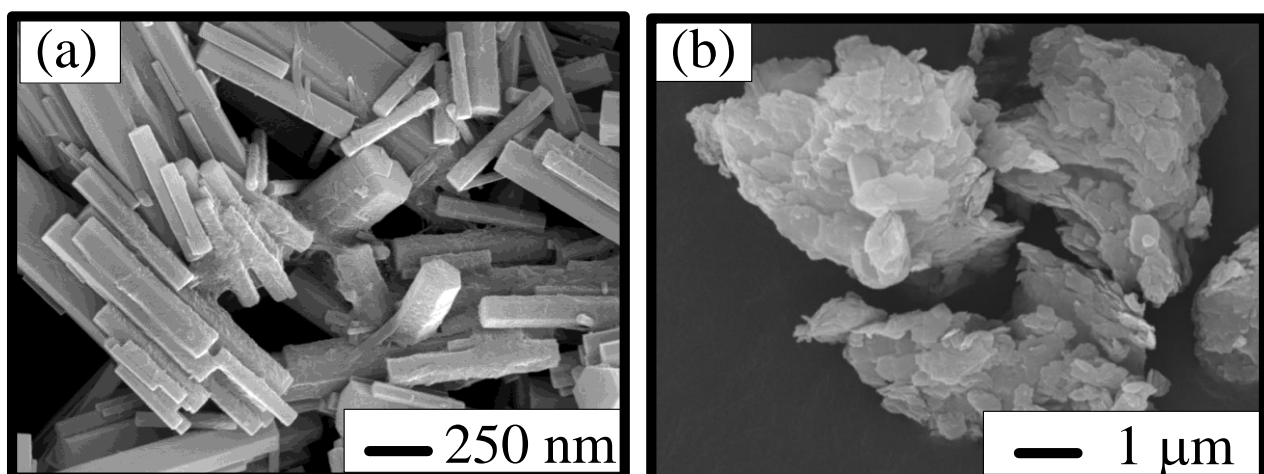

Figure S1. The SEM images of (a)  $h\text{-MoO}_3$  and (b)  $\text{MoO}_3\text{:BTA}$  microcrystals
